# Supplementary material for: Insights on the rate performance of polyaniline supercapacitors by integrated mathematical modeling and machine learning
Source: Royal Society of Chemistry journal article supplement (doi:10.1039/d4ta05780e), 2024-01-01
Supplement: d4ta05780e1.pdf [file d4ta05780e1.pdf]

# Insights on the Rate Performance of Polyaniline Supercapacitors by Integrated Mathematical Modeling and Machine Learning

Elham Rahmanian<sup>a</sup>, Rasoul Malekfar<sup>b</sup>, Ali Sajedi-Moghaddam<sup>a\*</sup>

<sup>a</sup>Condensed Matter National Laboratory, Institute for Research in Fundamental Sciences, Tehran 19395-5531, Iran

<sup>b</sup>Department of Physics, Faculty of Basic Sciences, Tarbiat Modares University, Tehran, Iran

\*Corresponding author

E-mail address: [amsajedi80@gmail.com](mailto:amsajedi80@gmail.com)

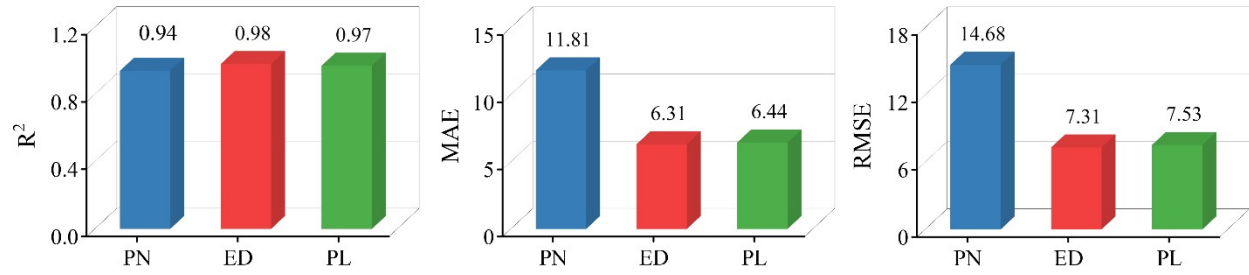

**Figure S1.** Comparison of  $R^2$ , MAE, and RMSE fit metrics for mathematical models of rate performance. The exponential decay model performs best, followed by the power law, with both outperforming the polynomial model.

**Table S1.** Collected data for modeling rate performance of PANI-based SCs. “a”, “b”, and “c” are the rate performance parameters obtained by fitting an exponential decay function.

| Dopant                         | SSA   | AMR | BR | CR | CC       | Electrolyte                               | PW   | Start CD | End CD | a        | b      | c       | DOI                                            |
|--------------------------------|-------|-----|----|----|----------|-------------------------------------------|------|----------|--------|----------|--------|---------|------------------------------------------------|
| H <sub>2</sub> SO <sub>4</sub> | 179   | 85  | 5  | 10 | FTO      | H <sub>2</sub> SO <sub>4</sub>            | 1    | 0.1      | 2      | 147.732  | 1.395  | 127.830 | 10.1016/j.electacta.2017.09.109                |
| H <sub>2</sub> SO <sub>4</sub> | 267   | 85  | 5  | 10 | FTO      | H <sub>2</sub> SO <sub>4</sub>            | 1    | 0.1      | 2      | 243.304  | 2.255  | 240.702 |                                                |
| H <sub>2</sub> SO <sub>4</sub> | 256   | 85  | 5  | 10 | FTO      | H <sub>2</sub> SO <sub>4</sub>            | 1    | 0.1      | 2      | 234.857  | 2.043  | 212.146 |                                                |
| H <sub>2</sub> SO <sub>4</sub> | 99.7  | 80  | 5  | 15 | Carbon   | H <sub>2</sub> SO <sub>4</sub>            | 1    | 0.5      | 10     | 139.970  | 0.506  | 226.392 | 10.1016/j.est.2023.107764<br>10.1038/srep21002 |
| HCl                            | 3     | 85  | 5  | 15 | Carbon   | H <sub>2</sub> SO <sub>4</sub>            | 0.7  | 0.5      | 40     | 172.591  | 0.0844 | 170.583 |                                                |
| PA                             | 45    | 85  | 5  | 15 | Carbon   | H <sub>2</sub> SO <sub>4</sub>            | 0.7  | 5        | 40     | 326.202  | 0.0346 | 0       |                                                |
| HCl+PA                         | 32    | 85  | 5  | 15 | Carbon   | H <sub>2</sub> SO <sub>4</sub>            | 0.7  | 0.5      | 40     | 155.886  | 0.6375 | 343.661 |                                                |
| HCl+PA                         | 15    | 85  | 5  | 15 | Carbon   | H <sub>2</sub> SO <sub>4</sub>            | 0.7  | 0.5      | 40     | 250.497  | 0.0133 | 0       |                                                |
| PA                             | 60    | 100 | 0  | 0  | Carbon   | PVA-H <sub>2</sub> SO <sub>4</sub>        | 0.8  | 1        | 20     | 301.221  | 0.3254 | 278.006 | 10.1021/acsami.5b00504                         |
| HCl                            | 12.63 | 100 | 0  | 0  | ITO      | LiClO <sub>4</sub>                        | 0.8  | 1        | 10     | 76.890   | 0.122  | 19.571  | 10.1039/d0ta08263e                             |
| HCl                            | 16.18 | 80  | 5  | 15 | Steel    | H <sub>2</sub> SO <sub>4</sub>            | 1.2  | 0.75     | 15     | 207.540  | 0.196  | 61.285  | 10.1021/ef301795g                              |
| HCl                            | 26.62 | 80  | 10 | 10 | Free     | H <sub>2</sub> SO <sub>4</sub>            | 0.8  | 1        | 5      | 214.695  | 0.816  | 118.218 | 10.1002/pat.5670                               |
| H <sub>2</sub> SO <sub>4</sub> | 22.1  | 100 | 0  | 0  | Platinum | BQHQ-H <sub>2</sub> SO <sub>4</sub> -AcOH | 0.65 | 4        | 240    | 3620.362 | 0.150  | 603.158 | 10.1002/adma.201400966                         |
| H <sub>2</sub> SO <sub>4</sub> | 22.1  | 100 | 0  | 0  | Platinum | BQHQ-H <sub>2</sub> SO <sub>4</sub> -AcOH | 0.65 | 0.5      | 30     | 494.222  | 0.551  | 464.136 |                                                |
| H <sub>2</sub> SO <sub>4</sub> | 22.1  | 100 | 0  | 0  | Platinum | H <sub>2</sub> SO <sub>4</sub> -AcOH      | 0.65 | 4        | 240    | 466.997  | 0.001  | 0       |                                                |
| H <sub>2</sub> SO <sub>4</sub> | 22.1  | 100 | 0  | 0  | Platinum | H <sub>2</sub> SO <sub>4</sub> -AcOH      | 0.65 | 0.5      | 30     | 253.537  | 0.035  | 157.084 |                                                |
| PA                             | 48    | 95  | 5  | 0  | Carbon   | He-Ao-H <sub>3</sub> PO <sub>4</sub>      | 0.8  | 0.25     | 20     | 208.297  | 0.516  | 188.362 | 10.1021/acssuschemeng.8b01175                  |
| PA                             | 48    | 95  | 5  | 0  | Carbon   | He-Ao-H <sub>3</sub> PO <sub>4</sub>      | 0.8  | 0.05     | 4      | 94.710   | 1.587  | 162.779 |                                                |
| HCl                            | 29    | 100 | 0  | 0  | Carbon   | H <sub>2</sub> SO <sub>4</sub>            | 0.8  | 1        | 5      | 646.625  | 0.291  | 0       | 10.1007/s00289-021-03971-9                     |
| HCl                            | 12.13 | 80  | 0  | 20 | Carbon   | H <sub>2</sub> SO <sub>4</sub>            | 1.2  | 1        | 3.5    | 128.706  | 0.832  | 84.157  | 10.1039/d1nj05380a                             |
| HCl                            | 27.05 | 80  | 10 | 10 | Carbon   | H <sub>2</sub> SO <sub>4</sub>            | 0.8  | 1        | 5      | 44.102   | 0.556  | 62.486  | 10.1016/j.jallcom.2022.163733                  |
| HCl                            | 57.8  | 100 | 0  | 0  | Carbon   | H <sub>2</sub> SO <sub>4</sub>            | 0.8  | 0.5      | 25     | 339.564  | 1.065  | 458.219 | 10.1016/j.polymer.2016.01.049                  |
| H <sub>2</sub> SO <sub>4</sub> | 68.9  | 100 | 0  | 0  | Carbon   | H <sub>2</sub> SO <sub>4</sub>            | 0.8  | 0.5      | 25     | 256.696  | 0.950  | 332.749 |                                                |
| HNO <sub>3</sub>               | 66.8  | 100 | 0  | 0  | Carbon   | H <sub>2</sub> SO <sub>4</sub>            | 0.8  | 0.5      | 25     | 228.228  | 0.490  | 318.459 |                                                |
| HCl                            | 31.1  | 100 | 0  | 0  | Carbon   | H <sub>2</sub> SO <sub>4</sub>            | 0.8  | 0.5      | 25     | 85.128   | 0.211  | 139.567 |                                                |
| H <sub>2</sub> SO <sub>4</sub> | 27.6  | 70  | 10 | 20 | Nickel   | HClO <sub>4</sub> -NaClO <sub>4</sub>     | 0.75 | 0.3      | 6      | 388.285  | 0.255  | 23.221  | 10.1007/s10008-016-3464-4                      |
| HClO <sub>4</sub>              | 361   | 80  | 10 | 10 | Carbon   | H <sub>2</sub> SO <sub>4</sub>            | 0.6  | 0.5      | 10     | 143.541  | 0.167  | 237.007 | 10.1016/j.apsusc.2017.10.010                   |
| PA                             | 25.3  | 100 | 0  | 0  | Carbon   | H <sub>2</sub> SO <sub>4</sub>            | 0.8  | 0.2      | 30     | 336.428  | 0.018  | 0       | 10.1002/mame.202200180                         |
| HCl                            | 17.89 | 80  | 10 | 10 | Nickel   | KOH                                       | 0.65 | 1        | 10     | 131.829  | 1.313  | 91.377  | 10.1016/j.est.2023.108825                      |
| H <sub>2</sub> SO <sub>4</sub> | 30.8  | 80  | 10 | 10 | Nickel   | KOH                                       | 0.45 | 2        | 10     | 712.964  | 0.201  | 625.313 | 10.1007/s10854-020-03297-8                     |
| Pzdc                           | 14.08 | 100 | 0  | 0  | Carbon   | KCl                                       | 1    | 0.2      | 50     | 273.219  | 3.063  | 45.121  | 10.1016/j.est.2022.105740                      |
| H <sub>2</sub> SO <sub>4</sub> | 137.5 | 100 | 0  | 0  | Carbon   | H <sub>2</sub> SO <sub>4</sub>            | 1    | 1        | 10     | 84.941   | 0.215  | 152.608 | 10.1016/j.electacta.2018.07.098                |
| H <sub>2</sub> SO <sub>4</sub> | 35.36 | 100 | 0  | 0  | Carbon   | H <sub>2</sub> SO <sub>4</sub>            | 1    | 1        | 32     | 273.349  | 0.0390 | 50.522  | 10.1016/j.est.2021.102738                      |
| H <sub>2</sub> SO <sub>4</sub> | 137.5 | 100 | 0  | 0  | Carbon   | H <sub>2</sub> SO <sub>4</sub>            | 0.6  | 1        | 10     | 460.733  | 0.055  | 0       | 10.1016/j.jpowsour.2016.10.110                 |
| HCl                            | 35    | 80  | 10 | 10 | Steel    | H <sub>2</sub> SO <sub>4</sub>            | 0.68 | 1        | 8      | 117.910  | 0.271  | 179.227 | 10.1016/j.cej.2016.01.069                      |
| Acid free                      | 315   | 85  | 5  | 10 | FTO      | H <sub>2</sub> SO <sub>4</sub>            | 0.7  | 0.1      | 2      | 505.284  | 3.644  | 232.939 | 10.1016/j.jpowsour.2016.04.113                 |
| Acid free                      | 234   | 85  | 5  | 10 | FTO      | H <sub>2</sub> SO <sub>4</sub>            | 0.7  | 0.1      | 2      | 192.459  | 1.702  | 154.258 |                                                |
| Acid free                      | 154   | 85  | 5  | 10 | FTO      | H <sub>2</sub> SO <sub>4</sub>            | 0.7  | 0.1      | 2      | 114.346  | 1.527  | 37.326  |                                                |
| Sodium Phytate                 | 230   | 100 | 0  | 0  | FTO      | H <sub>2</sub> SO <sub>4</sub>            | 0.8  | 1        | 40     | 212.860  | 0.320  | 374.955 | 10.3390/polym13142329                          |
| HCl                            | 21    | 85  | 5  | 10 | Carbon   | H <sub>2</sub> SO <sub>4</sub>            | 1    | 1        | 10     | 218.131  | 0.212  | 24.387  | 10.1016/j.jallcom.2020.156602                  |
| HCl                            | 62.2  | 80  | 10 | 10 | Carbon   | H <sub>2</sub> SO <sub>4</sub>            | 0.8  | 0.14     | 0.56   | 163.087  | 6.981  | 108.393 | 10.1016/j.est.2023.107328                      |
| HCl                            | 61.5  | 80  | 5  | 15 | Carbon   | H <sub>2</sub> SO <sub>4</sub>            | 1    | 0.5      | 50     | 120.872  | 0.086  | 147.212 | 10.1016/j.matdes.2017.04.053                   |
| HCl                            | 17.85 | 80  | 5  | 15 | Carbon   | H <sub>2</sub> SO <sub>4</sub>            | 0.8  | 1        | 10     | 164.526  | 0.211  | 180.165 | 10.1016/j.mseb.2017.05.001                     |
| HCl                            | 36.3  | 70  | 10 | 20 | Steel    | Na <sub>2</sub> SO <sub>4</sub>           | 2    | 0.5      | 10     | 172.258  | 0.467  | 112.479 | 10.1016/j.polymer.2022.125235                  |

|                                         |       |     |    |    |          |                                      |      |      |     |          |        |         |                                   |
|-----------------------------------------|-------|-----|----|----|----------|--------------------------------------|------|------|-----|----------|--------|---------|-----------------------------------|
| HCl                                     | 24.48 | 70  | 10 | 20 | Carbon   | H <sub>2</sub> SO <sub>4</sub>       | 0.7  | 0.5  | 20  | 470.203  | 1.297  | 563.572 | 10.1016/j.polymer.2018.12.037     |
| HCl                                     | 30.2  | 70  | 10 | 20 | Carbon   | H <sub>2</sub> SO <sub>4</sub>       | 0.7  | 0.5  | 20  | 77.066   | 0.254  | 376.862 |                                   |
| HClO <sub>4</sub>                       | 17.6  | 75  | 5  | 20 | Nickel   | Na <sub>2</sub> SO <sub>4</sub>      | 1    | 0.1  | 2   | 57.964   | 2.539  | 77.384  | 10.1007/s10854-017-6961-z         |
| HCl                                     | 53.1  | 85  | 5  | 10 | Nickel   | TEABF <sub>4</sub> -PC               | 0.8  | 0.5  | 4   | 219.860  | 0.340  | 0       | 10.1016/j.carbon.2012.09.055      |
| HCl                                     | 17.87 | 100 | 0  | 0  | Carbon   | H <sub>2</sub> SO <sub>4</sub>       | 0.6  | 0.5  | 10  | 185.757  | 0.313  | 21.823  | 10.1016/j.electacta.2022.140740   |
| HCl                                     | 17.87 | 100 | 0  | 0  | Carbon   | H <sub>2</sub> SO <sub>4</sub> -HQ   | 0.6  | 0.5  | 10  | 507.018  | 0.877  | 98.728  |                                   |
| HCl                                     | 17.87 | 100 | 0  | 0  | Carbon   | H <sub>2</sub> SO <sub>4</sub>       | 1    | 2    | 10  | 225.247  | 0.123  | 0       |                                   |
| HCl                                     | 17.87 | 100 | 0  | 0  | Carbon   | H <sub>2</sub> SO <sub>4</sub> -HQ   | 1    | 2    | 10  | 249.644  | 0.037  | 0       |                                   |
| CSA+H <sub>2</sub> SO <sub>4</sub>      | 45.2  | 70  | 10 | 20 | Carbon   | Et <sub>4</sub> NBF <sub>4</sub> -AN | 1.4  | 1    | 100 | 79.135   | 0.059  | 107.036 | 10.1016/j.ccej.2017.05.094        |
| HCl                                     | 16.81 | 80  | 5  | 15 | Nickel   | KOH                                  | 0.5  | 1    | 10  | 83.444   | 0.059  | 0       | 10.1016/j.est.2021.102303         |
| HCl                                     | 35    | 95  | 0  | 5  | Gold     | H <sub>2</sub> SO <sub>4</sub>       | 0.9  | 0.2  | 20  | 396.099  | 0.126  | 46.515  | 10.1016/j.compositesb.2018.09.069 |
| HCl                                     | 31.9  | 80  | 10 | 10 | Carbon   | H <sub>2</sub> SO <sub>4</sub>       | 1    | 0.1  | 5   | 132.299  | 0.474  | 272.088 | 10.1016/j.est.2022.105893         |
| H <sub>2</sub> SO <sub>4</sub>          | 41.9  | 80  | 5  | 15 | Titanium | H <sub>2</sub> SO <sub>4</sub>       | 0.8  | 1    | 50  | 393.646  | 0.142  | 276.285 | 10.1016/j.synthmet.2013.10.010    |
| TFA                                     | 43.8  | 80  | 10 | 10 | Carbon   | H <sub>2</sub> SO <sub>4</sub>       | 0.8  | 1    | 20  | 331.056  | 0.018  | 0       | 10.1021/acsam.0c01309             |
| HCl                                     | 50.4  | 100 | 0  | 0  | Carbon   | H <sub>2</sub> SO <sub>4</sub>       | 1    | 1    | 20  | 718.765  | 0.002  | 0.001   | 10.1016/j.electacta.2021.138448   |
| HCl                                     | 36.8  | 100 | 0  | 0  | Carbon   | H <sub>2</sub> SO <sub>4</sub>       | 1    | 1    | 20  | 129.674  | 0.143  | 413.914 |                                   |
| HCl                                     | 29.4  | 100 | 0  | 0  | Carbon   | H <sub>2</sub> SO <sub>4</sub>       | 1    | 1    | 20  | 100.810  | 0.171  | 375.025 |                                   |
| HCl                                     | 36.3  | 80  | 10 | 10 | Carbon   | H <sub>2</sub> SO <sub>4</sub>       | 1    | 1    | 10  | 128.995  | 0.273  | 179.194 | 10.1016/j.apsusc.2022.153457      |
| HCl                                     | 24.58 | 80  | 10 | 10 | Steel    | H <sub>2</sub> SO <sub>4</sub>       | 1    | 0.5  | 10  | 194.541  | 0.271  | 146.616 | 10.1021/acsam.3c00507             |
| HCl                                     | 38    | 85  | 10 | 5  | Steel    | H <sub>2</sub> SO <sub>4</sub>       | 1    | 0.5  | 10  | 684.227  | 0.856  | 41.710  | 10.1021/acsam.2c01040             |
| H <sub>2</sub> SO <sub>4</sub>          | 30.9  | 90  | 5  | 5  | Carbon   | H <sub>2</sub> SO <sub>4</sub>       | 0.7  | 1    | 30  | 30.134   | 0.127  | 375.835 | 10.1021/jp405300p                 |
| H <sub>2</sub> SO <sub>4</sub>          | 67.9  | 90  | 5  | 5  | Carbon   | H <sub>2</sub> SO <sub>4</sub>       | 0.7  | 1    | 30  | 68.339   | 0.067  | 280.329 |                                   |
| H <sub>2</sub> SO <sub>4</sub>          | 77.1  | 90  | 5  | 5  | Carbon   | H <sub>2</sub> SO <sub>4</sub>       | 0.7  | 1    | 30  | 47.059   | 0.083  | 455.338 |                                   |
| H <sub>2</sub> SO <sub>4</sub>          | 30.9  | 90  | 5  | 5  | Carbon   | H <sub>2</sub> SO <sub>4</sub> -HQ   | 0.5  | 1    | 30  | 229.110  | 0.289  | 511.605 |                                   |
| H <sub>2</sub> SO <sub>4</sub>          | 67.9  | 90  | 5  | 5  | Carbon   | H <sub>2</sub> SO <sub>4</sub> -HQ   | 0.5  | 1    | 30  | 211.755  | 0.223  | 453.336 |                                   |
| H <sub>2</sub> SO <sub>4</sub>          | 77.1  | 90  | 5  | 5  | Carbon   | H <sub>2</sub> SO <sub>4</sub> -HQ   | 0.5  | 1    | 30  | 255.726  | 0.096  | 669.929 |                                   |
| HCl                                     | 10    | 80  | 10 | 10 | Carbon   | H <sub>2</sub> SO <sub>4</sub>       | 1.2  | 1    | 20  | 431.271  | 0.262  | 65.591  | 10.1002/sml.201403744             |
| HCl                                     | 10    | 80  | 10 | 10 | Carbon   | H <sub>2</sub> SO <sub>4</sub>       | 1.6  | 1    | 20  | 456.481  | 0.212  | 83.451  |                                   |
| HCl                                     | 10    | 80  | 10 | 10 | Carbon   | H <sub>2</sub> SO <sub>4</sub>       | 2    | 1    | 20  | 403.181  | 0.213  | 97.307  |                                   |
| H <sub>2</sub> SO <sub>4</sub>          | 22.1  | 80  | 5  | 15 | Steel    | H <sub>2</sub> SO <sub>4</sub>       | 1    | 0.5  | 5   | 97.859   | 0.194  | 37.416  | 10.1016/j.jallcom.2017.06.068     |
| HCl                                     | 42    | 90  | 5  | 5  | Steel    | H <sub>2</sub> SO <sub>4</sub>       | 0.9  | 1    | 20  | 110.965  | 0.171  | 314.284 | 10.1016/j.jallcom.2022.166856     |
| DBSA+H <sub>2</sub> S<br>O <sub>4</sub> | 48.8  | 80  | 5  | 15 | Steel    | H <sub>2</sub> SO <sub>4</sub>       | 1    | 5    | 100 | 196.453  | 0.028  | 112.846 | 10.1016/j.synthmet.2023.117451    |
| H <sub>2</sub> SO <sub>4</sub>          | 6     | 100 | 0  | 0  | Steel    | H <sub>2</sub> SO <sub>4</sub>       | 1    | 1    | 3   | 457.746  | 1.052  | 85.721  | 10.1016/j.mseb.2023.116432        |
| H <sub>2</sub> SO <sub>4</sub>          | 7     | 100 | 0  | 0  | Steel    | H <sub>2</sub> SO <sub>4</sub>       | 1    | 1    | 3   | 386.073  | 0.335  | 0       |                                   |
| H <sub>2</sub> SO <sub>4</sub>          | 25    | 100 | 0  | 0  | Steel    | H <sub>2</sub> SO <sub>4</sub>       | 1    | 1    | 3   | 963.924  | 1.193  | 429.351 |                                   |
| H <sub>2</sub> SO <sub>4</sub>          | 21    | 100 | 0  | 0  | Steel    | H <sub>2</sub> SO <sub>4</sub>       | 1    | 1    | 3   | 258.351  | 0.188  | 0       |                                   |
| HCl                                     | 63    | 90  | 5  | 5  | Steel    | H <sub>2</sub> SO <sub>4</sub>       | 1    | 0.1  | 10  | 554.673  | 0.218  | 0       | 10.1021/am4018016                 |
| H <sub>2</sub> SO <sub>4</sub>          | 21.92 | 80  | 10 | 10 | Nickel   | Na <sub>2</sub> SO <sub>4</sub>      | 1    | 1    | 5   | 1052.311 | 1.141  | 63.552  | 10.1039/c7se00490g                |
| HCl                                     | 21.9  | 72  | 5  | 23 | Steel    | H <sub>2</sub> SO <sub>4</sub>       | 1    | 2    | 10  | 213.358  | 0.111  | 117.683 | 10.1021/acs.iecr.5b02507          |
| MSA                                     | 27.6  | 80  | 10 | 10 | Steel    | PVA-H <sub>2</sub> SO <sub>4</sub>   | 1    | 0.5  | 10  | 48.302   | 0.151  | 0.314   | 10.1016/j.electacta.2023.143263   |
| MSA                                     | 38.9  | 80  | 10 | 10 | Steel    | PVA-H <sub>2</sub> SO <sub>4</sub>   | 1    | 0.5  | 10  | 44.979   | 0.136  | 8.637   |                                   |
| MSA                                     | 28.6  | 80  | 10 | 10 | Steel    | PVA-H <sub>2</sub> SO <sub>4</sub>   | 1    | 0.5  | 10  | 42.379   | 0.207  | 9.007   |                                   |
| HCl                                     | 94.5  | 70  | 10 | 20 | Carbon   | H <sub>2</sub> SO <sub>4</sub>       | 0.9  | 1    | 20  | 78.357   | 0.072  | 430.662 | 10.1016/j.electacta.2019.135259   |
| HCl                                     | 89.2  | 70  | 10 | 20 | Carbon   | H <sub>2</sub> SO <sub>4</sub>       | 0.9  | 1    | 20  | 136.481  | 0.069  | 353.003 |                                   |
| H <sub>2</sub> SO <sub>4</sub>          | 29.26 | 80  | 10 | 10 | Nickel   | KOH                                  | 0.45 | 2    | 10  | 737.250  | 0.230  | 643.273 | 10.1016/j.ijhydene.2020.04.093    |
| HCl                                     | 32    | 80  | 10 | 10 | Carbon   | H <sub>2</sub> SO <sub>4</sub>       | 1    | 0.5  | 20  | 508.955  | 0.218  | 225.643 | 10.1016/j.electacta.2018.09.178   |
| HCl                                     | 22.58 | 80  | 5  | 15 | Nickel   | Na <sub>2</sub> SO <sub>4</sub>      | 1    | 0.5  | 5   | 402.770  | 0.8774 | 78.867  | 10.1016/j.jelechem.2017.08.014    |
| HCl                                     | 237   | 85  | 5  | 10 | Carbon   | H <sub>2</sub> SO <sub>4</sub>       | 0.8  | 1    | 20  | 176.218  | 0.158  | 121.933 | 10.1016/j.carbon.2019.05.043      |
| HCl                                     | 40.5  | 90  | 0  | 10 | Titanium | H <sub>2</sub> SO <sub>4</sub>       | 1    | 0.4  | 2   | 345.494  | 1.748  | 78.425  | 10.1039/c3ra00151b                |
| H <sub>2</sub> SO <sub>4</sub>          | 32.3  | 80  | 10 | 10 | Steel    | H <sub>2</sub> SO <sub>4</sub>       | 1    | 0.2  | 5   | 170.951  | 0.501  | 218.828 | 10.1007/s00339-019-2883-3         |
| H <sub>2</sub> SO <sub>4</sub>          | 14.6  | 80  | 10 | 10 | Steel    | H <sub>2</sub> SO <sub>4</sub>       | 1    | 0.2  | 5   | 105.982  | 0.333  | 151.525 |                                   |
| H <sub>2</sub> SO <sub>4</sub>          | 55    | 80  | 10 | 10 | Steel    | H <sub>2</sub> SO <sub>4</sub>       | 1    | 0.2  | 5   | 210.963  | 0.630  | 280.770 |                                   |
| HClO <sub>4</sub>                       | 34.4  | 100 | 0  | 0  | Platinum | H <sub>2</sub> SO <sub>4</sub>       | 0.8  | 0.3  | 6   | 44.267   | 0.770  | 176.520 | 10.1021/nn1000035                 |
| HCl                                     | 53.44 | 75  | 5  | 20 | Carbon   | H <sub>2</sub> SO <sub>4</sub>       | 0.8  | 0.5  | 3   | 349.820  | 1.480  | 323.941 | 10.1016/j.jallcom.2018.05.108     |
| HCl                                     | 29.68 | 75  | 10 | 15 | Steel    | H <sub>2</sub> SO <sub>4</sub>       | 0.8  | 0.5  | 10  | 237.898  | 0.270  | 100.644 | 10.1007/s11051-022-05418-2        |
| HCl                                     | 215.3 | 80  | 5  | 15 | Steel    | H <sub>2</sub> SO <sub>4</sub>       | 1.2  | 0.25 | 2.5 | 241.955  | 1.392  | 323.733 | 10.1016/j.jpowsour.2014.09.013    |
| HCl                                     | 21.9  | 72  | 5  | 23 | Steel    | H <sub>2</sub> SO <sub>4</sub>       | 1    | 2    | 10  | 205.237  | 0.118  | 126.725 | 10.1039/c5ra01949d                |

|                                |      |     |    |   |          |                                |     |   |    |         |       |         |                        |
|--------------------------------|------|-----|----|---|----------|--------------------------------|-----|---|----|---------|-------|---------|------------------------|
| HCl                            | 10.3 | 85  | 10 | 5 | Platinum | H <sub>2</sub> SO <sub>4</sub> | 0.8 | 1 | 10 | 128.252 | 0.164 | 196.821 | 10.1039/d1qm01059j     |
| HCl                            | 84.6 | 100 | 0  | 0 | Carbon   | H <sub>2</sub> SO <sub>4</sub> | 1   | 1 | 10 | 74.310  | 0.279 | 447.660 | 10.1021/acsanm.3c02021 |
| H <sub>3</sub> PO <sub>4</sub> | 68.3 | 100 | 0  | 0 | Carbon   | H <sub>2</sub> SO <sub>4</sub> | 1   | 1 | 10 | 18.415  | 0.231 | 427.683 |                        |
| H <sub>2</sub> SO <sub>4</sub> | 75.5 | 100 | 0  | 0 | Carbon   | H <sub>2</sub> SO <sub>4</sub> | 1   | 1 | 10 | 21.259  | 0.525 | 411.107 |                        |
| HCl                            | 84.6 | 85  | 10 | 5 | Steel    | H <sub>2</sub> SO <sub>4</sub> | 1   | 1 | 10 | 107.376 | 0.273 | 117.086 |                        |
| H <sub>3</sub> PO <sub>4</sub> | 68.3 | 85  | 10 | 5 | Steel    | H <sub>2</sub> SO <sub>4</sub> | 1   | 1 | 10 | 112.002 | 0.352 | 109.970 |                        |
| H <sub>2</sub> SO <sub>4</sub> | 75.5 | 85  | 10 | 5 | Steel    | H <sub>2</sub> SO <sub>4</sub> | 1   | 1 | 10 | 118.681 | 0.274 | 60.624  |                        |
